# Supplementary material for: Perception of social inequities in the access to the kidney transplant waiting list by nephrology trainees: a national survey
Source: PubMed Central journal article supplement (PMC9733200; doi:10.1186/s12882-022-03017-w), 2022-12-08
Supplement: 12882_2022_3017_MOESM1_ESM.pdf [file 12882_2022_3017_MOESM1_ESM.pdf]

**Additional file 1. Unvalidated English version of the french questionnaire**

- Sex:
- Age:
- Semester of internship:
- University hospital centre:
- Your main area of interest in nephrology:
  - Nephrology
  - Dialysis
  - Transplantation

---

**QUESTIONNAIRE**

1/In the French health system, according to you, is male gender of the recipient a factor of inequality in the access to the kidney transplant waiting list?

- 1 = Strongly disagree
- 2 = Disagree
- 3 = Undecided
- 4 = Agree
- 5 = Strongly agree
- 0 = Don't know

2/In the French health system, according to you, is female gender of the recipient a factor of inequality in the access to the kidney transplant waiting list?

- 1 = Strongly disagree
- 2 = Disagree
- 3 = Undecided
- 4 = Agree
- 5 = Strongly agree
- 0 = Don't know

If you want to add more details to your answer, please mention them:

.....  
.....

3/According to you, is age a factor in inequality in the access to the kidney transplant waiting list?

- 1 = Strongly disagree
- 2 = Disagree
- 3 = Undecided

- 4 = Agree
- 5 = Strongly agree
- 0 = Don't know

If you want to add more details to your answer, please mention them:

.....  
.....

4/Can being born abroad be taken into account in the inequalities of registration on the kidney transplant waiting list in France?

- 1 = Strongly disagree
- 2 = Disagree
- 3 = Undecided
- 4 = Agree
- 5 = Strongly agree
- 0 = Don't know

If you want to add more details to your answer, please mention them:

.....  
.....

5/Do you think that the place of residence of the patient is a factor of inequality in the access to the kidney transplant waiting list?

- 1 = Strongly disagree
- 2 = Disagree
- 3 = Undecided
- 4 = Agree
- 5 = Strongly agree
- 0 = Don't know

If you want to add more details to your answer, please mention them:

.....  
.....

6/In your opinion, can the education level be a factor of unequal access to kidney transplant?

- 1 = Strongly disagree
- 2 = Disagree
- 3 = Undecided
- 4 = Agree
- 5 = Strongly agree
- 0 = Don't know

If you want to add more details to your answer, please mention them:

.....  
.....

7/In your experience, can the following categories of people have restricted access to the kidney transplant waiting list? Check one or more answers.

- Unemployment
- Person with physical disability
- Person with mental disability
- Persons suffering from addiction
- Stay-at-home patient
- Pensioner
- Other:
- 0 = Don't know

If you want to add more details to your answer, please mention them:

.....  
.....

8/Do you think that the patient's income level can influence access to registration on the kidney transplant waiting list?

- 1 = Strongly disagree
- 2 = Disagree
- 3 = Undecided
- 4 = Agree
- 5 = Strongly agree
- 0 = Don't know

If you want to add more details to your answer, please mention them:

.....  
.....

9/In your centre, do you think you have the means to adapt your information to all patients concerning registration on the kidney transplant waiting list?

- 1 = Strongly disagree
- 2 = Disagree
- 3 = Undecided
- 4 = Agree
- 5 = Strongly agree
- 0 = Don't know

If you want to add more details to your answer, please mention them:

.....  
.....

10/In your opinion, is the transplant centre caring for the patient a factor of unequal access to registration on the kidney transplant waiting list?

- 1 = Strongly disagree

- 2 = Disagree
- 3 = Undecided
- 4 = Agree
- 5 = Strongly agree
- 0 = Don't know

If you want to add more details to your answer, please mention them:

.....  
.....

11/In your opinion, does the health care professional have some responsibility in these inequalities of access to the kidney transplant?

- 1 = Strongly disagree
- 2 = Disagree
- 3 = Undecided
- 4 = Agree
- 5 = Strongly agree
- 0 = Don't know

If you want to add more details to your answer, please mention them:

.....  
.....

12/Finally, do you think there may be other criteria that may hinder access to registration on the kidney transplant waiting list?

- 1 = Strongly disagree
- 2 = Disagree
- 3 = Undecided
- 4 = Agree
- 5 = Strongly agree
- 0 = Don't know

If you want to add more details to your answer, please mention them:

.....  
.....
