# Supplementary material for: Perception of social inequities in the access to the kidney transplant waiting list by nephrology trainees: a national survey
Source: PubMed Central journal article supplement (PMC9733200; doi:10.1186/s12882-022-03017-w), 2022-12-08
Supplement: 12882_2022_3017_MOESM4_ESM.pdf [file 12882_2022_3017_MOESM4_ESM.pdf]

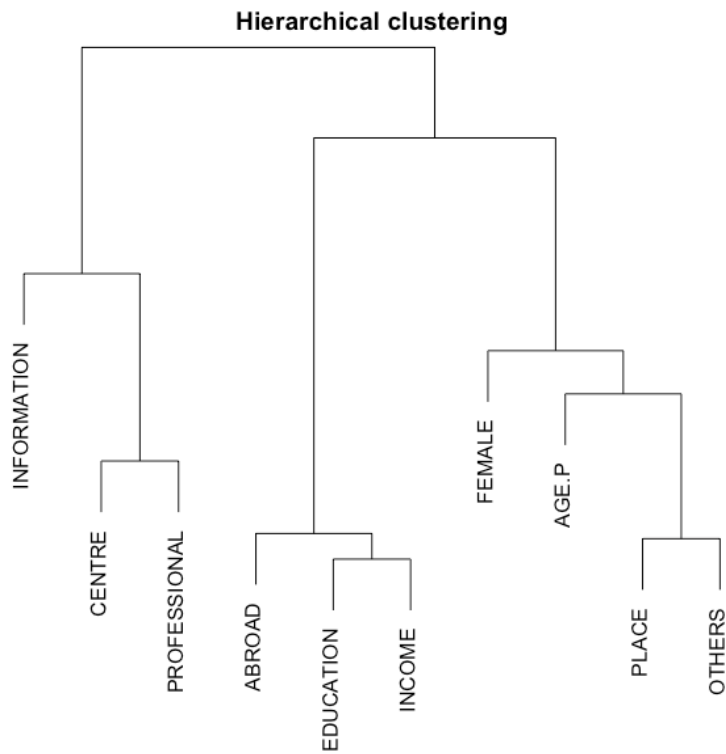

**Additional file 4. Hierarchical clustering**

INFORMATION: centre provision to adapt the information, CENTRE: transplant centre, PROFESSIONAL: health care professional, ABROAD: born abroad, EDUCATION: education level, INCOME: income level, FEMALE: female sex, AGE. P: age of the patient, PLACE: living place, OTHERS: other factors
