# Supplementary material for: Perception of social inequities in the access to the kidney transplant waiting list by nephrology trainees: a national survey
Source: PubMed Central journal article supplement (PMC9733200; doi:10.1186/s12882-022-03017-w), 2022-12-08
Supplement: 12882_2022_3017_MOESM5_ESM.pdf [file 12882_2022_3017_MOESM5_ESM.pdf]

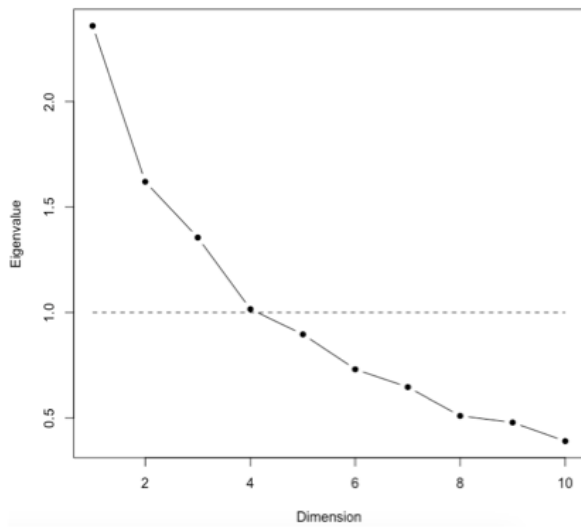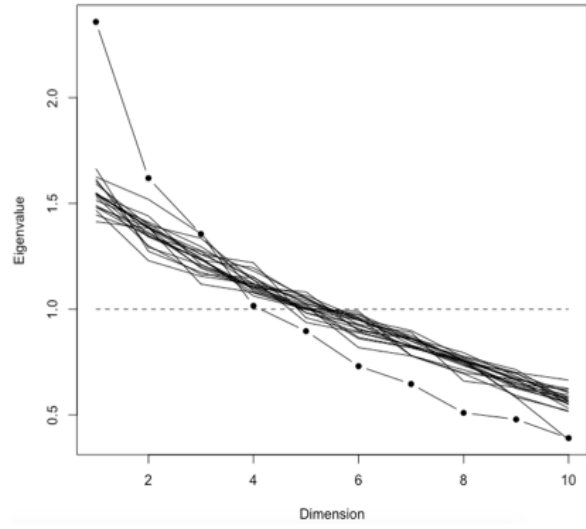

**Additional file 5. Scree plots**

Left side: scree plot for 10 items (all of the questions, except the variables male sex and the multiple choice questions on specific categories of person)

Right side: Scree plot for the same 10 items, with a parallel analysis
